# Risk of Celiac Disease in Children With Type 1 Diabetes Is Modified by Positivity for *HLA-DQB1\*02-DQA1\*05* and *TNF-308A*

ZDENEK SUMNIK, MD, PHD<sup>1</sup>  
ONDREJ CINEK, MD, PHD<sup>1</sup>  
NINA BRATANIC, MD<sup>2</sup>  
OLGA KORDONOURI, PHD<sup>3</sup>  
MICHAL KULICH, PHD<sup>1</sup>  
BARNABAS ROSZAI, MD<sup>4</sup>

ANDRAS ARATO, MD, PHD<sup>5</sup>  
JAN LEBL, MD, PHD<sup>6</sup>  
GYULA SOLTESZ, MD, PHD<sup>4</sup>  
THOMAS DANNE, MD<sup>7</sup>  
TADEJ BATTELINO, MD, PHD<sup>2</sup>  
EDIT SCHÖBER, MD<sup>8</sup>

**OBJECTIVE** — The overlap between genetic susceptibility to celiac disease (CD) and to type 1 diabetes is incomplete; therefore, some genetic polymorphisms may significantly modify the risk of CD in subjects with type 1 diabetes. This study aimed to investigate whether the susceptibility to CD in diabetic children is modified by positivity for *HLA-DQB1\*02-DQA1\*05* and *DQB1\*0302-DQA1\*03* and by alleles of single nucleotide polymorphisms within the genes encoding *CTLA4*, transforming growth factor (*TGF*)- $\beta$ , tumor necrosis factor (*TNF*)- $\alpha$ , interferon (*IFN*)- $\gamma$ , interleukin (*IL*)-1, *IL*-2, *IL*-6, and *IL*-10.

**RESEARCH DESIGN AND METHODS** — Genotypic data were compared between 130 case subjects (children with type 1 diabetes and CD diagnosed using endomysium antibodies) and 245 control subjects (children with type 1 diabetes only, optimally two per case, matched for center, age at type 1 diabetes onset, and type 1 diabetes duration). The subjects were recruited from 10 major European pediatric diabetes centers performing regular screening for CD. The polymorphisms were determined using PCR with sequence-specific primers, and the risk was assessed by building a step-up conditional logistic regression model using variables that were significantly associated with CD in the univariate analysis.

**RESULTS** — The best-fitted model showed that risk of CD is increased by presence of *HLA-DQB1\*02-DQA1\*05* (odds ratio 4.5 [95% CI 1.8–11], for homozygosity, and 2.0 [1.1–3.7], for a single dose) and also independently by *TNF-308A* (1.9 [1.1–3.2], for phenotypic positivity), whereas *IL1- $\alpha$ -889T* showed a weak negative association (0.6 [0.4–0.9]).

**CONCLUSIONS** — The results indicate that the risk of CD in children with type 1 diabetes is significantly modified both by the presence of *HLA-DQB1\*02-DQA1\*05* and by a variant of another gene within the major histocompatibility complex, the *TNF-308A*.

*Diabetes Care* 29:858–863, 2006

From the <sup>1</sup>Motol University Hospital, the Second Medical School, Charles University, Prague, The Czech Republic; the <sup>2</sup>University Children's Hospital, Department of Pediatric and Adolescent Endocrinology, Ljubljana, Slovenia; the <sup>3</sup>Clinic of General Pediatrics, Otto-Heubner-Centrum, Charité, Campus Virchow-Klinikum, Humboldt University, Berlin, Germany; the <sup>4</sup>Department of Pediatrics, University of Pecs, Pecs, Hungary; the <sup>5</sup>First Department of Pediatrics, Semmelweis University, Budapest, Hungary; the <sup>6</sup>Department of Pediatrics, The Third Medical School, Charles University, Prague, The Czech Republic; <sup>7</sup>Kinderkrankenhaus auf der Bult, Hannover, Germany; and the <sup>8</sup>University Children's Hospital, University of Vienna, Vienna, Austria.

Address correspondence and reprint requests to Ondrej Cinek, MD, PhD, Department of Pediatrics, Motol University Hospital, Charles University Prague, V Uvalu 84, CZ-150 06, Prague, The Czech Republic. E-mail: ondrej.cinek@lfmotol.cuni.cz.

Received for publication 9 October 2005 and accepted in revised form 15 January 2006.

Z.S. and O.C. contributed equally to this work.

**Abbreviations:** CD, celiac disease; IHWC, 13th International Histocompatibility Workshop and Conference; IL, interleukin; PCR-SSP, PCR with sequence-specific primers; SNP, single nucleotide polymorphism; TNF, tumor necrosis factor.

A table elsewhere in this issue shows conventional and Système International (SI) units and conversion factors for many substances.

© 2006 by the American Diabetes Association.

The costs of publication of this article were defrayed in part by the payment of page charges. This article must therefore be hereby marked "advertisement" in accordance with 18 U.S.C. Section 1734 solely to indicate this fact.

Celiac disease (CD) is the second most prevalent autoimmune condition accompanying type 1 diabetes, after autoimmune thyroid disease. In Europe, CD is ~10 times more frequent in patients with type 1 diabetes than in the respective general populations (1). The reason for the association has not yet been fully elucidated. The environment of the ongoing diabetic autoimmunity may be a stimulant to the development of CD, a disease that possesses autoimmune features. Also, the genetic susceptibility to both conditions substantially overlaps: a certain degree of susceptibility to both diseases is associated with the HLA molecules *DQB1\*0302-DQA1\*03* and *DQB1\*02-DQA1\*05*, encoded either in *cis* or *trans*. The *CTLA4* polymorphisms have also been implicated, as well as several polymorphisms within the genes encoding for cytokines.

However, the overlap of the genetic susceptibility is incomplete. This is well demonstrated in the *HLA-DQ* region: the main determinant of CD risk is *HLA-DQB1\*02-DQA1\*05*, whereas for type 1 diabetes in populations of central and northern Europe, it is *HLA-DQB1\*0302-DQA1\*03*. There are also strong indications that certain variants of the tumor necrosis factor (*TNF*)- $\alpha$  gene, another gene residing within the major histocompatibility complex, are associated with CD independently of *HLA-DQ* (2–5), whereas in type 1 diabetes, the *TNF* association is secondary to that of *HLA* (6,7), although this opinion is not universally accepted (8,9). *CTLA4 +49A/G* is a marker associated with both diseases: type 1 diabetes (as well as several other autoimmune diseases) is associated with the G allele (rev. in 10), whereas for CD, the studies on the association have yielded conflicting results.

Thus, CD and type 1 diabetes differ in the strength or direction of genetic association with particular alleles of the same genes. Such a difference might be useful for determining the level of CD risk among patients with type 1 diabetes. This idea is appealing because genetic testing

**Table 1—Characteristics of case subjects (diabetic children with CD diagnosed using endomysial antibodies) and matched control subjects (diabetic children without CD)**

|                                                                  | Case subjects | Control subjects |
|------------------------------------------------------------------|---------------|------------------|
| <i>n</i>                                                         | 130           | 245              |
| The Czech Republic (Prague)                                      | 34            | 69               |
| Austria (Vienna)                                                 | 23            | 46               |
| Slovenia (Ljubljana)                                             | 21            | 29               |
| Hungary (Pecs and Budapest)                                      | 25            | 48               |
| Germany (Berlin and Hannover)                                    | 18            | 35               |
| Portugal (Lisbon)                                                | 5             | 9                |
| Slovakia (Kosice)                                                | 4             | 9                |
| M:F ratio ( <i>n</i> )                                           | 72:58         | 134:111          |
| Ethnicity ( <i>n</i> )                                           |               |                  |
| European Caucasian                                               | 128           | 243              |
| Other (Asian)                                                    | 2             | 2                |
| Age at type 1 diabetes onset [median (interquartile range)]      | 4.6 (2.8–8.2) | 4.6 (2.2–7.7)    |
| Type 1 diabetes duration at study [median (interquartile range)] | 7.3 (4.3–11)  | 6.9 (3.9–11)     |
| Results of small bowel biopsy in case subjects                   |               |                  |
| Results available                                                | 114 (88%)     |                  |
| Total or subtotal atrophy                                        | 97            |                  |
| Increased intraepithelial lymphocytes                            | 13            |                  |
| Normal                                                           | 4             |                  |
| Results not available                                            | 16 (12%)      |                  |
| Biopsy not performed—typical symptoms present                    | 3             |                  |
| Biopsy refused by parents                                        | 5             |                  |
| Unsuccessful biopsy                                              | 2             |                  |
| Biopsy not indicated by physician                                | 6             |                  |

might introduce ways to better target the CD antibody screening, ultimately leading to more efficient early detection of the condition.

The hypothesis of an *HLA-DQB1\*02-DQA1\*05*-associated susceptibility to CD in children with type 1 diabetes has been tested in several previous single-center studies. Most of these studies suffer from a low statistical power to detect a possible effect. To overcome this difficulty, we set out to undertake a sufficiently powered international multicenter case-control study aimed to answer the question whether *HLA-DQB1\*02-DQA1\*05*, *HLA-DQB1\*0302-DQA1\*03*, *CTLA4 +49A/G* polymorphisms, and polymorphisms within selected cytokine genes modify the risk of CD among children with type 1 diabetes. The aim was to test DNA from all available children with both type 1 diabetes and CD (case subjects) and to compare their genotypes with closely matched children with type 1 diabetes but without CD (control subjects). We decided to

match for the following: center because genetic background differs among populations, age at diabetes onset because it is influenced by the *HLA-DQ* genotype, and diabetes duration because the cumulative risk of CD rises within years after the diagnosis of type 1 diabetes.

## RESEARCH DESIGN AND METHODS

We performed a case-control study where the case subjects were children with both CD and type 1 diabetes and the control subjects were children with type 1 diabetes only, matched to the case subjects by center, age at type 1 diabetes onset, and duration of diabetes. Optimally, two control subjects should have been identified for each case. Ten centers from seven countries participated in the study. All participating children should have manifested with type 1 diabetes by their 15th birthday, and case subjects should have manifested with CD by their 18th birthday. All available diabetic children with CD cared for

by the center were approached and asked to participate. The nature of the study was described to the child, parents, or guardian before a written consent was obtained, in accordance with the procedures approved by the ethics committee at the particular center. Basic clinical and laboratory data were collected retrospectively from the patient's records. Two matched control subjects were identified for each case. First, the case was assigned to a 5-year band of age at type 1 diabetes onset. Then, two control children were selected at the same center from the same age-at-onset band, one being the child manifesting with type 1 diabetes just before and the other just next to the case. If the selected control subjects were not available or did not agree to participate, the selection went further to the next eligible control subject.

The characteristics of subjects are given in Table 1. The participating centers recruited 130 eligible case subjects with both type 1 diabetes and CD. The case subjects had been identified by endomysium antibody screening that was positive on two separate occasions and confirmed by small bowel biopsy in most instances. The case subjects were matched to 245 control subjects (for single case subjects, two matched counterparts could not be found). The control subjects were deemed free of CD based on the annual endomysium antibody testing. The case and control subjects were European Caucasians except for four subjects of Asian origin (one control subject from Vienna, one case subject from Berlin, and one case and one control subject from Hannover). Several exceptions were allowed from the matching criteria because the center had no better control subjects available: 25 (10%) control subjects were selected from the neighboring lower or higher band of age at type 1 diabetes onset, and seven control subjects were selected although they had manifested with type 1 diabetes after their 15th birthday, with the maximum age at onset being 17 years and 1 month.

Either genetic material was obtained from the center's DNA archives or EDTA-anticoagulated blood was drawn from the child, sent by mail to the central laboratory, and processed using the QiaAmp Blood DNA extraction kits (Qiagen, Germany). All DNA samples were quantified using a real-time assay for the human albumin gene, and 83 of 375 (22%) samples, which had an insufficient total DNA amount, were pre-amplified using the

Genomi-Phi whole-genome amplification kit (Amersham) according to the manufacturer's instructions. Because all downstream assays were based on PCR with sequence-specific primers (PCR-SSP), the quantity of the DNA was equalized among all samples by diluting, using data from real-time quantification of the human albumin gene.

The genotypes of HLA-DQB1, -DQA1 were determined using an in-house assay based on PCR-SSP. The performance of the assays is controlled by an exchange of samples with the Tissue Typing Laboratory IKEM in Prague, a laboratory accredited by the European Federation of Immunogenetics. The assay for DQA1 and DQB1 typing includes 24 reactions distinguishing the DQA1\*01–06 alleles and the DQB1\*02, 0301, 0302, 0303, 0304, 0401, 0402, 0501, 0502, 0503, 0601, 0602, 0603, and 0604–9 alleles. Full-typing data were necessary to determine the dose of DQB1\*02-DQA1\*05 and DQB1\*0302 in the individual. The CTLA4 +49A/G was determined using a previously reported PCR-SSP technique (11). The cytokine single nucleotide polymorphism (SNP) PCR-SSP typing was performed using a protocol with the sequence-specific primers developed for the cytokine component of the 13th International Histocompatibility Workshop and Conference (IHWG) (12). The laboratory was controlled within the 13th IHWG proficiency testing and achieved the accuracy of 98%. Seventeen SNPs were tested within 10 different genes for cytokines (interleukin [IL]-1 $\alpha$  –889 T/C; IL-1 $\beta$  –511 C/T and +3962 C/T; IL-2 –330 T/G and +160 G/T; IL-6 –174 G/C and +565 G/A; IL-10 haplotypes of three SNPs at –1082, –819, and –590, ACC/GCC/ATA; TNF –308 A/G and –238 G/A; TGF $\beta$ 1 codon 10 C/T and 25 G/C; IFN- $\gamma$  UTR 5644 A/T) and for IL-1-related molecules (IL-1R 1970 C/T, IL-1RA 11100 T/C). The design of the sequence-specific primers also allowed us to directly determine the phase of SNPs in haplotypes of TGF- $\beta$ 1, TNF, IL-2, IL-6, and IL-10.

The association of the variants with CD was first tested by conditional logistic regression for matched data. The outcome variable identified whether the individual was a case subject (patient with type 1 diabetes and CD, encoded as 1) or a control subject (patient with type 1 diabetes only, encoded as 0). The identifier of the matching group was used as the conditioning variable. The independent variables were the phenotype positivity

for the examined alleles or haplotypes in a univariate model. Then, the variables achieving a *P* value of the Wald statistics at <0.05 in the univariate analysis were used for step-up building of a conditional logistic regression model. The best-fitted model was determined using the likelihood ratio test statistics. All models were—apart from conditioning for the matching identifier—adjusted for the matching variables. Analyses were performed using the Stata 9.0 program (StataCorp, College Station, TX). The sample size provided an 80% power at  $\alpha = 0.05$  to detect an effect size with an odds ratio (OR) of  $\geq 1.83$  for a genetic factor present in 50% of the control subjects (e.g., the HLA-DQB1\*02-DQA1\*05): this OR corresponds to a  $\geq 65\%$  prevalence in case subjects. Similarly, the study had an 80% power to detect an OR >1.86 for a genetic factor with a 30% prevalence among control subjects or OR >2.07 for a genetic factor with a 70% prevalence.

**RESULTS**— The results of the univariate analysis of the case-control status versus phenotypic positivity of the studied factors are shown in Table 2. HLA-DQB1\*02-DQA1\*05 was found in 77% of the case subjects and 53% of the control subjects, being strongly associated with CD among type 1 diabetic subjects ( $P < 10^{-3}$ ). The effect of DQB1\*02-DQA1\*05 is adequately described by a codominant model taking the gene dose into account; there is a proportional rise in risk with gene dose. HLA-DQB1\*0302-DQA1\*03 shows a weak negative association with CD. Among the cytokine genes, TNF –308A is strongly associated with CD ( $P < 10^{-3}$ ), whereas the weak negative association of IL1 $\alpha$  –889 disappears after correction for multiple testing.

The best-fitted regression model is shown in Table 3. Although HLA-DQB1\*0302-DQA1\*03 completely lost its effect after being adjusted for HLA-DQB1\*02-DQA1\*05, both cytokine SNP alleles retained the association observed in the univariate analysis. Homozygosity for HLA-DQB1\*02-DQA1\*05 increased the risk of CD roughly fourfold, whereas the presence of a single dose of DQB1\*02-DQA1\*05 doubled the risk relative to individuals carrying no HLA-DQB1\*02-DQA1\*05. In the final model, both HLA-DQB1\*02-DQA1\*05 and TNF –308A retained the statistical significance, indicating an independent effect: the risk was roughly doubled also by the presence of the –308A variant of the TNF. While the

association of HLA-DQB1\*02-DQA1\*05 was dose dependent, such an effect could neither be confirmed nor refuted for the TNF –308A dose. IL-1 $\alpha$  –889T was associated with a marginal decrease in CD risk. No interaction terms between the variables could further improve the fit.

The results did not change after exclusion of four subjects having other than European Caucasian descent (e.g., the OR for a double dose of DQB1\*02-DQA1\*05 was 4.45 [95% CI 1.75–11.3], in the whole dataset vs. 4.27 [1.67–10.9], after exclusion of the subjects of non-European descent). Including sex into the analysis as one of the predictors neither improved the fit nor changed the results at the first two decimal positions of the risk estimate.

**CONCLUSIONS**— The present study clearly demonstrates that factors inside HLA significantly modify the risk of CD in children with type 1 diabetes. The HLA-DQB1\*02-DQA1\*05 increases the risk in a dose-dependent manner, with a significant contribution of TNF –308A.

The observed effect of HLA-DQB1\*02-DQA1\*05 may have been expected in populations where DQB1\*02-DQA1\*05 confers a lower risk of type 1 diabetes than CD but has seldom been documented. The first study to indicate that DQB1\*02 is overrepresented among diabetic children with CD was published 10 years ago by Saukkonen et al. (13), based on a longitudinal observation of 775 diabetic children that identified 18 case subjects of CD diagnosed after type 1 diabetes onset. A later Czech study suggested that HLA-DQB1\*0201-DQA1\*05 is associated with a fourfold increased risk of CD in children with type 1 diabetes (14), based on data from 15 children with CD identified from a cohort of 345 diabetic children, of whom 186 were genotyped. However, the CI of the risk estimate was wide. The association was not replicated in an Italian study of 25 children with CD and type 1 diabetes compared with 79 children with type 1 diabetes only (15): the DQB1\*0201-DQA1\*05 frequency was 68% in the former group and 62% in the latter group. The authors concluded that the previously seen association may have been population specific, which is likely particularly for the Italian population where DQB1\*0201-DQA1\*05 is frequent among diabetic subjects. Another study comes from Australia (16): an increased frequency of HLA-DQB1\*0201-DQA1\*05

Table 2—Univariate analysis of genetic factors tested for association with CD in children with diabetes

|                                       | Case subjects (%) | Control subjects (%) | OR (95%CI)       | P      |
|---------------------------------------|-------------------|----------------------|------------------|--------|
| <i>n</i>                              | 130               | 245                  |                  |        |
| <i>HLA-DQB1*02-DQA1*05</i>            |                   |                      |                  |        |
| Dominant model*                       | 77                | 53                   | 2.97 (1.78–4.97) | <0.001 |
| Codominant model†                     |                   |                      |                  |        |
| Two doses of <i>DQB1*02-DQA1*05</i>   | 17                | 7                    | 5.94 (2.54–14)   | <0.001 |
| Single dose of <i>DQB1*02-DQA1*05</i> | 60                | 46                   | 2.53 (1.48–4.34) | 0.001  |
| No <i>DQB1*02-DQA1*05</i>             | 23                | 47                   | 1.0: reference   |        |
| <i>HLA-DQB1*0302-DQA1*03</i>          | 52                | 65                   | 0.58 (0.36–0.93) | 0.024  |
| Cytokines and related molecules       |                   |                      |                  |        |
| <i>IL-1α -889 T/C</i>                 |                   |                      |                  |        |
| T                                     | 38                | 49                   | 0.64 (0.42–0.98) | 0.041  |
| C                                     | 94                | 90                   | 1.69 (0.72–3.93) | 0.23   |
| <i>IL-1β</i>                          |                   |                      |                  |        |
| –511 C                                | 88                | 91                   | 0.84 (0.42–1.69) | 0.64   |
| –511 T                                | 59                | 56                   | 1.12 (0.72–1.74) | 0.61   |
| +3962 C                               | 98                | 97                   | 1.84 (0.47–7.2)  | 0.38   |
| +3962 T                               | 41                | 45                   | 0.82 (0.54–1.26) | 0.37   |
| <i>IL-1R 1970 C/T</i>                 |                   |                      |                  |        |
| C                                     | 88                | 87                   | 1.15 (0.58–2.30) | 0.69   |
| T                                     | 59                | 55                   | 1.18 (0.76–1.87) | 0.46   |
| <i>IL-1RA 11100 T/C</i>               |                   |                      |                  |        |
| T                                     | 89                | 93                   | 0.59 (0.27–1.31) | 0.20   |
| C                                     | 53                | 59                   | 0.81 (0.52–1.26) | 0.36   |
| <i>IFN-γ UTR 5644 A/T</i>             |                   |                      |                  |        |
| A                                     | 84                | 82                   | 1.19 (0.68–2.10) | 0.54   |
| T                                     | 72                | 72                   | 1.00 (0.61–1.63) | 1.0    |
| <i>TGF-β1</i>                         |                   |                      |                  |        |
| Codon 10 C                            | 68                | 60                   | 1.35 (0.87–2.11) | 0.12   |
| Codon 10 T                            | 81                | 84                   | 0.77 (0.43–1.37) | 0.37   |
| Codon 25 G                            | 100               | 99                   |                  | 0.99   |
| Codon 25 C                            | 12                | 15                   | 0.75 (0.38–1.46) | 0.40   |
| <i>TNF-α</i>                          |                   |                      |                  |        |
| –308 G                                | 90                | 93                   | 0.59 (0.26–1.36) | 0.22   |
| –308 A                                | 68                | 45                   | 2.7 (1.7–4.31)   | <0.001 |
| –238 G                                | 100               | 100                  |                  | 0.99   |
| –238 A                                | 5                 | 10                   | 0.44 (0.18–1.1)  | 0.080  |
| <i>IL-2</i>                           |                   |                      |                  |        |
| –330 T                                | 95                | 95                   | 1.01 (0.34–2.7)  | 0.98   |
| –330 G                                | 52                | 47                   | 1.22 (0.78–1.91) | 0.38   |
| +160 G                                | 85                | 83                   | 1.36 (0.74–2.48) | 0.32   |
| +160 T                                | 54                | 63                   | 0.67 (0.43–1.03) | 0.068  |
| <i>IL-6</i>                           |                   |                      |                  |        |
| –174 G                                | 79                | 82                   | 0.84 (0.5–1.44)  | 0.54   |
| –174 C                                | 71                | 70                   | 1.2 (0.73–1.99)  | 0.46   |
| nt565 G                               | 82                | 86                   | 0.76 (0.44–1.33) | 0.34   |
| nt565 A                               | 67                | 68                   | 1.05 (0.65–1.71) | 0.83   |
| <i>IL-10 haplotype</i>                |                   |                      |                  |        |
| ACC                                   | 59                | 50                   | 1.52 (0.98–2.34) | 0.064  |
| ATA                                   | 47                | 51                   | 0.77 (0.49–1.19) | 0.24   |
| GCC                                   | 61                | 64                   | 0.98 (0.68–1.52) | 0.94   |
| <i>CTLA4</i>                          |                   |                      |                  |        |
| +49A                                  | 86                | 80                   | 1.44 (0.81–2.57) | 0.21   |
| +49G                                  | 59                | 64                   | 0.9 (0.59–1.38)  | 0.64   |

The ORs come from conditional logistic regression models where the outcome variable was the presence of CD in the diabetic child (i.e., whether the individual is a case = 1 versus a control = 0). The conditioning variable was the identifier of the matched set (matching stratum). The model was adjusted for the matching variables of age at diabetes onset and duration of diabetes. The presented *P* values are not corrected for multiple testing. \*In the dominant model, the predictor variable was 1 when any *DQB1\*02-DQA1\*05* was present (irrespective of dose) and 0 when no *DQB1\*02-DQA1\*05* was present. †In the codominant model, two indicator variables compare the levels of risk associated with the double dose and the single dose of *HLA-DQB1\*02-DQA1\*05*, relative to its absence.

Table 3—The best-fit multiple regression model for risk of CD in children with type 1 diabetes

| Genetic factor      | OR (95%CI)       | Wald P |
|---------------------|------------------|--------|
| HLA-DQB1*02-DQA1*05 |                  |        |
| Double dose*        | 4.45 (1.75–11.3) | 0.002  |
| Single dose*        | 2.04 (1.11–3.76) | 0.022  |
| TNF- $\alpha$ –308A | 1.87 (1.10–3.20) | 0.021  |
| IL-1 $\alpha$ –889T | 0.58 (0.37–0.93) | 0.023  |

The variables associated with CD in the univariate model were used to build a step-up multiple model. The predictor variables included two indicator variables showing a double and single dose of HLA-DQB1\*02-DQA1\*05 and dichotomous variables showing the phenotypic positivity for a given allele of a cytokine SNP. The adequacy of inclusion of predictor variables into the model was tested using the log-likelihood ratio test. No interaction terms improved the model. The effect of HLA-DQB1\*0302-DQA1\*03 observed in the univariate analysis was lost after adjusting for HLA-DQB1\*02-DQA1\*05. \*Two indicator variables compare the levels of risk relative to an absence of HLA-DQB1\*02-DQA1\*05.

was seen in diabetic subjects with CD (10/13, 77%) compared with subjects with type 1 diabetes but not CD (70/118, 59%), but this difference was not statistically significant. A clear limitation to these studies is the low number of identified case subjects (diabetic children also having CD): a single-center study therefore has a very substantial risk of type II error, i.e., not refuting the false null hypothesis due to low statistical power. Negative results reported by some of the studies should therefore be interpreted with caution. Two articles were published by a group from Denver, Colorado, who used positivity for the transglutaminase antibody as an end point, thus increasing the number of case subjects: the studies indicate a significant contribution of genetic factors to CD risk in diabetic individuals, since an increased prevalence of transglutaminase antibodies was reported in diabetic children carrying DQB1\*02-DQA1\*05 or being DQB1\*02-DQA1\*05 homozygous (17,18). Possible weak points of these two reports are that the antibodies were measured only one time and that analysis on ethnicity is not reported in a population that is likely to contain ethnic minorities.

In the present report, we show a significant effect of HLA-DQB1\*02-DQA1\*05 positivity that is probably a compound of the effects of DQB1\*02-DQA1\*05 itself and other genetic factors carried on the DQB1\*02-DQA1\*05 haplotypes, namely the TNF –308A. Whereas the pathogenic effect of DQB1\*02-DQA1\*05 in CD is well established and the association is primary, the association of the TNF –308A may be due either to its functional significance as a primary risk modifier or to a linkage disequilibrium to another variant on the haplotype. The former alternative is plausible for TNF- $\alpha$ ,

a potent proinflammatory cytokine involved in T-cell immunity. However, the data on the functional significance of its polymorphisms are conflicting (rev. in 19), and the TNF –308A may be just a passive marker traveling on a proinflammatory haplotype. The TNF- $\alpha$  gene lies between HLA class II and class I in what is termed the class III region. TNF –308A is known to be associated with the proinflammatory 8.1 ancestral haplotype, so other components of the haplotype may significantly contribute as well. There are many genes with known inflammatory roles in the close vicinity of TNF- $\alpha$ : lymphotoxin  $\alpha$ , the heat-shock protein-70 complex, the complement components 4A and 4B, and others.

Although the TNF –308A remains associated when adjusted for DQB1\*02-DQA1\*05 positivity, this fact does not allow us to deem the genetic association truly independent. Adjusting or matching only for DQB1\*02-DQA1\*05 phenotypic positivity is not enough, because we do not control the other chromosome in heterozygotes carrying one dose of DQB1\*02-DQA1\*05 (20). An alternative approach to dissecting the association may be to analyze only subjects positive for a fixed HLA-DQ genotype, e.g., the frequent HLA-DQB1\*02-DQA1\*05/DQB1\*0302-DQA1\*03. However, the power of this type of analysis of our dataset is low, because there are only 23 matching groups where a case and at least one control are positive for this genotype. In this small subset, we observed indications that the TNF –308A is associated with an increased risk of CD (OR 2.4 [95% CI 0.63–9.1],  $P = 0.20$ ).

An optimal design for a future study verifying the independence of the TNF –308A effect in determining the CD risk among diabetic individuals would involve matching for the primarily associ-

ated DQB1\*02-DQA1\*05 on both chromosomes. As seen in Table 2, there are not many DQB1\*02-DQA1\*05 homozygotes, only 17% among the case subjects and 7% among the control subjects. Thus, for such a relatively rare combination of diseases, it would be especially difficult to recruit a sufficient number of HLA-DQB1\*02-DQA1\*05 homozygous diabetic individuals with CD and to match them adequately with control subjects with type 1 diabetes but without CD.

The present study was the first to use matching for age at diabetes onset and duration of diabetes. This is because the age at onset is known to be influenced by the child's HLA genotype and because the cumulative incidence of CD rises with duration of exposure to type 1 diabetes. This careful matching, together with matching for study center, should eliminate possible bias due to the recent shift toward a younger age at type 1 diabetes onset observed in some populations. Another important reason for matching is the heterogeneity in the CD prevalence in diabetic children: the prevalences previously reported from populations in this study range from 3 to 12%, moreover with significant variations over time (14,21–25). Consequently, reliable estimations of absolute risks attributable to particular genotypes are impossible, although knowledge of them might be of interest for the clinician.

An important source of technical error was eliminated by equalizing the DNA content across the samples using real-time quantification. All the genotyping reactions we used were based on PCR with sequence-specific primers, a technique known to be sensitive to uneven DNA content. The adequacy of this approach is well documented by the high success rate in IHWC proficiency testing.

In conclusion, at least in some European populations, the risk of CD in children with type 1 diabetes is substantially modified by the child's genotype, with a contribution from both HLA-DQB1\*02-DQA1\*05 and the TNF –308A variant. Although there had been previous indications that children with diabetes differ in their risk of CD based on their HLA genotype, our study has conferred the strongest evidence so far, having collected the largest adequately matched case-control dataset. Although an immediate transition of the knowledge into clinical use is unlikely, in the future, genetic testing may be useful for stratifying the frequency of

testing diabetic children for antibodies indicative of CD.

**Acknowledgments**—This study was supported by the Czech Ministry of Health, grant no. 7413-3.

We acknowledge Catarina Limbert (Lisbon, Portugal) and Magdalena Paskova (Kosice, Slovakia) for providing the study with DNA samples from their patients.

## References

- Collin P, Kaukinen K, Valimaki M, Salmi J: Endocrinological disorders and celiac disease. *Endocr Rev* 23:464–483, 2002
- McManus R, Wilson AG, Mansfield J, Weir DG, Duff GW, Kelleher D: TNF2, a polymorphism of the tumour necrosis-alpha gene promoter, is a component of the celiac disease major histocompatibility complex haplotype. *Eur J Immunol* 26: 2113–2118, 1996
- de la Concha EG, Fernandez-Arquero M, Vigil P, Rubio A, Maluenda C, Polanco I, Fernandez C, Figueredo MA: Celiac disease and TNF promoter polymorphisms. *Hum Immunol* 61:513–517, 2000
- Garrote JA, Arranz E, Telleria JJ, Castro J, Calvo C, Blanco-Quiros A: TNF alpha and LT alpha gene polymorphisms as additional markers of celiac disease susceptibility in a DQ2-positive population. *Immunogenetics* 54:551–555, 2002
- Louka AS, Lie BA, Talseth B, Ascher H, Ek J, Gudjonsdottir AH, Sollid LM: Coeliac disease patients carry conserved HLA-DR3-DQ2 haplotypes revealed by association of TNF alleles. *Immunogenetics* 55: 339–343, 2003
- Pociot F, Wilson AG, Nerup J, Duff GW: No independent association between a tumor necrosis factor-alpha promoter region polymorphism and insulin-dependent diabetes mellitus. *Eur J Immunol* 23: 3050–3053, 1993
- Deng GY, Maclaren NK, Huang HS, Zhang LP, She JX: No primary association between the 308 polymorphism in the tumor necrosis factor alpha promoter region and insulin-dependent diabetes mellitus. *Hum Immunol* 45:137–142, 1996
- Moghaddam PH, Zwiderman AH, de Knijff P, Roep BO, Schipper RF, Van der Auwera B, Naipal A, Goris F, Schuit F, Giphart MJ: TNFa microsatellite polymorphism modulates the risk of IDDM in Caucasians with the high-risk genotype HLA DQA1\*0501-DQB1\*0201/DQA1\*0301B1\*0302: Belgian Diabetes Registry. *Diabetes* 46:1514–1515, 1997
- Bouqbis L, Akhayat O, Garchon HJ, Calafell F, Izaabel H: TNFA-TNFB haplotypes modify susceptibility to type 1 diabetes mellitus independently of HLA class II in a Moroccan population. *Tissue Antigens* 61:72–79, 2003
- Kavvoura FK, Ioannidis JP: CTLA-4 gene polymorphisms and susceptibility to type 1 diabetes mellitus: a HuGE Review and meta-analysis. *Am J Epidemiol* 162:3–16, 2005
- Cinek O, Drevinek P, Sumnik Z, Bendlova B, Kolouskova S, Snajderova M, Vavrinec J: The CTLA4 +49 A/G dimorphism is not associated with type 1 diabetes in Czech children. *Eur J Immunogenet* 29:219–222, 2002
- Hansen JA, Dupont B: HLA 2004: Immunobiology of the Human MHC. *Proceedings of the 13th International Histocompatibility Workshop and Congress*. Seattle, WA, IHW Press, 2004
- Saukkonen T, Savilahti E, Reijonen H, Ilonen J, Tuomilehto-Wolf E, Akerblom HK: Coeliac disease: frequent occurrence after clinical onset of insulin-dependent diabetes mellitus. Childhood Diabetes in Finland Study Group. *Diabet Med* 13: 464–470, 1996
- Sumnik Z, Kolouskova S, Cinek O, Kotalova R, Vavrinec J, Snajderova M: HLA-DQA1\*05-DQB1\*0201 positivity predisposes to coeliac disease in Czech diabetic children. *Acta Paediatr* 89:1426–1430, 2000
- Contreas G, Valletta E, Ulmi D, Cantoni S, Pinelli L: Screening of coeliac disease in north Italian children with type 1 diabetes: limited usefulness of HLA-DQ typing. *Acta Paediatr* 93:628–632, 2004
- Doolan A, Donaghue K, Fairchild J, Wong M, Williams AJ: Use of HLA typing in diagnosing celiac disease in patients with type 1 diabetes. *Diabetes Care* 28:806–809, 2005
- Bao F, Yu L, Babu S, Wang T, Hoffenberg E, Rewers M, Eisenbarth G: One third of HLA DQ2 homozygous patients with type 1 diabetes express celiac disease-associated transglutaminase autoantibodies. *J Autoimmun* 13:143–148, 1999
- Barker JM, Yu J, Yu L, Wang J, Miao D, Bao F, Hoffenberg E, Nelson JC, Gottlieb PA, Rewers M, Eisenbarth GS: Autoantibody “subspecificity” in type 1 diabetes: risk for organ-specific autoimmunity clusters in distinct groups. *Diabetes Care* 28:850–855, 2005
- Hajeer AH, Hutchinson IV: Influence of TNFalpha gene polymorphisms on TNFalpha production and disease. *Hum Immunol* 62:1191–1199, 2001
- Louka AS, Sollid LM: HLA in coeliac disease: unravelling the complex genetics of a complex disorder. *Tissue Antigens* 61:105–117, 2003
- Schober E, Bittmann B, Granditsch G, Huber WD, Huppe A, Jager A, Oberhuber G, Rami B, Reichel G: Screening by anti-endomysium antibody for celiac disease in diabetic children and adolescents in Austria. *J Pediatr Gastroenterol Nutr* 30:391–396, 2000
- Crone J, Rami B, Huber WD, Granditsch G, Schober E: Prevalence of celiac disease and follow-up of EMA in children and adolescents with type 1 diabetes mellitus. *J Pediatr Gastroenterol Nutr* 37:67–71, 2003
- Kordonouri O, Dieterich W, Schuppan D, Weibert G, Muller C, Sarioglu N, Becker M, Danne T: Autoantibodies to tissue transglutaminase are sensitive serological parameters for detecting silent coeliac disease in patients with type 1 diabetes mellitus. *Diabet Med* 17:441–444, 2000
- Kaspers S, Kordonouri O, Schober E, Grabert M, Hauffa BP, Holl RW: Anthropometry, metabolic control, and thyroid autoimmunity in type 1 diabetes with celiac disease: a multicenter survey. *J Pediatr* 145:790–795, 2004
- Arato A, Korner A, Veres G, Dezsofi A, Ujpal I, Madacsy L: Frequency of coeliac disease in Hungarian children with type 1 diabetes mellitus. *Eur J Pediatr* 162:1–5, 2003
